# Supplementary material for: European polygenic risk score for prediction of breast cancer shows similar performance in Asian women
Source: PubMed Central journal article supplement (PMC7395776; doi:10.1038/s41467-020-17680-w), 2020-07-31
Supplement: 41467_2020_17680_MOESM3_ESM.pdf [file 41467_2020_17680_MOESM3_ESM.pdf]

## **Description of Additional Supplementary Files**

File Name: Supplementary Data 1

Description: SNPs and odd ratios (Ors) for 313 SNPs used in the construction of overall breast cancer and subtype-Specific PRSs.
